# Supplementary material for: Evaluation of Field Sobriety Tests for Identifying Drivers Under the Influence of Cannabis: A Randomized Clinical Trial
Source: PubMed Central journal article supplement (PMC10398547; doi:10.1001/jamapsychiatry.2023.2345), 2023-08-02
Supplement: jamapsychiatry-e232345-s001.pdf [file jamapsychiatry-e232345-s001.pdf]

1  
2 **A Randomized, Controlled Trial of Cannabis in Healthy Volunteers**  
3 **Evaluating Simulated Driving, Field Performance Tests and Cannabinoid Levels**  
4

5 **RESEARCH PROTOCOL**  
6 May 21, 2020  
7

8  
9 **TABLE OF CONTENTS**

10  
11 PROJECT TITLE .....2  
12 PRINCIPAL INVESTIGATOR .....2  
13 CO-INVESTIGATORS .....2  
14 FACILITIES.....2  
15 ESTIMATED DURATION OF THE STUDY .....2  
16 LAY LANGUAGE SUMMARY OR SYNOPSIS .....2  
17 SPECIFIC AIMS .....2  
18 BACKGROUND AND SIGNIFICANCE .....3  
19 RESEARCH DESIGN AND METHODS .....4  
20     Participants.....4  
21     Visits .....4  
22     Supply and Administration of Cannabis.....5  
23     Assessments during Experimental Visits.....6  
24     Drug Recognition Expert Field Sobriety Test .....7  
25     Performance-based tablet assessments .....7  
26     Success of Blinding .....8  
27     Psychoactive Side Effects During Driving Simulation Sessions and After Consuming the Study Drug .....8  
28     Assays for  $\Delta$ 9-THC in Blood.....8  
29     Identification of Recent Cannabis Intake Using Whole Blood .....9  
30     Assays for Oral Fluid .....9  
31     Assays for Breath Specimens .....10  
32     Statistical Analysis Plan.....10  
33 HUMAN SUBJECTS .....11  
34     Inclusion criteria .....12  
35     Exclusion criteria .....12  
36     Recruitment and Procedures Preparatory to Research.....12  
37     Informed Consent.....13  
38     Potential Risks.....14  
39     Risk Management Procedures and Adequacy of Resources .....16  
40     Data and Safety Monitoring Board (DSMB).....16  
41     Privacy and Confidentiality Considerations Including Data Access and Management.....17  
42     Potential Benefits .....17  
43     Risk/Benefit Ratio .....18  
44     Expense to Participant.....18  
45     Compensation for Participation .....18  
46 FUNDING SUPPORT .....18  
47 DRUG PROCESSING .....18  
48 BIBLIOGRAPHY .....19  
49  
50  
51

52

53 **PROJECT TITLE**

54 A Randomized, Controlled Trial of Cannabis in Healthy Volunteers Evaluating Simulated Driving, Field  
55 Performance Tests and Cannabinoid Levels

56 **PRINCIPAL INVESTIGATOR**

57 Thomas D. Marcotte PhD, Professor, Department of Psychiatry

58 **CO-INVESTIGATORS**

59 Robert L. Fitzgerald, PhD, Professor, Department of Pathology

60 David J. Grelotti, MD, Associate Professor, Department of Psychiatry

61 **FACILITIES**

62 The study will be conducted at the Center for Medicinal Cannabis Research (CMCR), which is co-located with  
63 the HIV Neurobehavioral Research Program (HNRP) facility at 220 Dickinson Street, MC8231, San Diego, CA  
64 92103-8231. Two rooms have been outfitted with a negative pressure system to enable cannabis to be vented  
65 to the atmosphere without contaminating the workspace of others working in this building. We will use the  
66 Investigational Drug Service 200 West Arbor Drive, Suite 1-317, San Diego, CA 92103-8765, for the storage of  
67 cannabis.

68 **ESTIMATED DURATION OF THE STUDY**

69 It is estimated that the study will take 3 years.

70 **LAY LANGUAGE SUMMARY OR SYNOPSIS**

71 This study was authorized by the California Legislature (Assembly Bill 266, the Medical Marijuana Regulation  
72 and Safety Act)<sup>1</sup> to help with detection of driving under the influence of cannabis. Healthy volunteers will  
73 inhale smoked cannabis with either 0.02% (placebo), 5.9%, or 13.4%  $\Delta$ 9-tetrahydrocannabinol (THC) at the  
74 beginning of the day, and complete driving simulations, iPad-based performance assessments, and bodily fluid  
75 draws (e.g., blood, oral fluid [OF], breath) before the cannabis smoking and over the subsequent 6 hours. The  
76 first specific aims address the relationship of the dose of  $\Delta$ 9-THC on driving performance and the duration of  
77 driving impairment in terms of hours from initial use.

78 **SPECIFIC AIMS**

79 The first specific Aims are:

80  
81 Aim 1 To determine the impact of  $\Delta$ 9-THC dose on driving performance.

82 Hypothesis 1. During an 8-hour driving simulation session, 0.02% (placebo), 5.9%, and 13.4%  $\Delta$ 9-THC  
83 will demonstrate a stair-step progression in worsening on the Composite Drive Score, a composite of  
84 key driving variables. Participants' driving performance will be worse under the influence of 13.4%  $\Delta$ 9-  
85 THC than under the influence of 5.9%  $\Delta$ 9-THC, which in turn will be worse than when a participant is  
86 under the influence of placebo  $\Delta$ 9-THC.

87  
88 Aim 2 To determine the time course of driving impairment in terms of hours from initial use.

89 Hypothesis 2. During the six hours post inhalation of cannabis, 13.4%, 5.9%, and 0.02% (placebo)  $\Delta$ 9-  
90 THC will demonstrate a stair-step pattern with respect to the recovery from the effects of cannabis on  
91 driving performance. By this is meant that reduced driving performance under the influence of 13.4%  
92  $\Delta$ 9-THC will last longer than 5.9%  $\Delta$ 9-THC, which in turn will last longer than when a participant is  
93 under the influence of placebo  $\Delta$ 9-THC.

94

95

96

97 **BACKGROUND AND SIGNIFICANCE**

98 There are several studies suggesting that higher doses of whole-blood or plasma  $\Delta 9$ -THC concentration are  
99 associated with increased crash risk and crash culpability<sup>2-4</sup>. However, attempts to define a cut-off point for  
100 blood  $\Delta 9$ -THC levels have proven to be challenging. Unlike alcohol, for which a level can be reasonably  
101 measured using a breathalyzer (and confirmed with a blood test), detection of a cut-off point for intoxication  
102 related to  $\Delta 9$ -THC concentration has eluded scientific verification. Recent evidence suggests blood  $\Delta 9$ -THC  
103 concentrations of 2-5 ng/mL are associated with substantial driving impairment, particularly in occasional  
104 smokers<sup>5</sup>. Others have countered that this level leads to false positives, particularly in heavy cannabis users  
105 inasmuch as THC may be detectable in their blood specimens for 12-24 hours after inhalation<sup>6</sup>. Given that 12  
106 to 24 hours is beyond the likely period of driving impairment<sup>7</sup>, this would appear to be a justifiable objection to  
107 a per se cut-off point for a  $\Delta 9$ -THC concentration indicative of impairment. Maximal driving impairment is found  
108 20 to 40 minutes after smoking, and the risk of driving impairment may decrease after 2.5 hours, at least in  
109 those who smoke 18 mg  $\Delta 9$ -THC or less, the dose often used experimentally to duplicate a single joint<sup>7</sup>. Other  
110 studies, however, report residual MVA crash risk when cannabis is used within 4 hours prior to driving<sup>2,3,8-10</sup>.

111  
112 The roadside examination using the Standardized Field Sobriety Test (SFST) for proof of cannabis-related  
113 impairment has not been an ideal alternative to blood levels. Originally devised to evaluate impairment under  
114 the influence of alcohol, the SFST is comprised of three examinations administered in a standardized manner  
115 by law enforcement officers. The 'Horizontal Gaze Nystagmus' (HGN), the 'One Leg Stand' (OLS) and the  
116 'Walk and Turn' test (WAT) require a person to follow instructions and perform motor activities. During the  
117 assessments, officers observe and record signs of impairment. In one study,  $\Delta 9$ -THC produced impairments  
118 on overall SFST performance in only 50 % of the participants<sup>11</sup>. In a separate study involving acute  
119 administration of cannabis, 30% of people failed the SFST<sup>12</sup>. This discrepancy in rate of failure was thought to  
120 be in part due to the participant's cannabis use history. The reported frequency of cannabis use varied from  
121 once a week to once every 2-6 months in the study where there was the SFSTs identified impairment in 50%  
122 of the participants. The other study included more frequent users who smoked cannabis on at least four  
123 occasions per week. Previous studies demonstrated that heavy cannabis users develop tolerance to the  
124 impairing effects of  $\Delta 9$ -THC on neurocognitive measures<sup>13,14</sup>. The same phenomena may hold true for the  
125 SFSTs.

126  
127 Based upon the above, another means to help law enforcement officers discern driving under the  
128 influence of cannabis would be helpful. One future possibility is the development of performance-based  
129 measures of cannabis-related impairments. We have developed brief tablet-based measures in order to be  
130 practicably administered repeatedly over a short time period, that if successful in the future could be used in  
131 the field by law enforcement officers (e.g., a cannabis-focused field sobriety test).

132  
133 Although blood and plasma levels leave a lot to be desired in terms of a cut-off point for impaired driving,  
134 there is still a great deal of interest in biological markers among law makers. In all probability, oral fluid will  
135 probably become the most prevalent matrix for roadside screening<sup>15</sup>. The rationale is that legislators and police  
136 officers will desire rapid analysis of driving under the influence of cannabis testing at the roadside, eliminating  
137 transport of detainees to hospitals or police stations for a phlebotomy to determine a blood level. Moreover,  
138 knowing the time cannabis was last used is important for determining impairment in crash investigations.  
139 Currently, this is performed using whole blood or plasma. Consequently, a correlation for the time estimate of  
140 marijuana exposure from a more contemporaneous matrix (e.g., oral fluid) would be of value. Two decades  
141 ago, two models for predicting time of last cannabis use from single plasma cannabinoid concentrations were  
142 devised. Model I used simple regression with the 9-tetrahydrocannabinol (THC) concentration, while model II  
143 used a simple regression equation with the ratio of 11-nor-9-carboxy-THC (THCCOOH) to THC<sup>16</sup>. An objective  
144 of the current study will be to extend such studies using analyses of cannabinoids in saliva and breath.

145  
146 Detection of  $\Delta 9$ -THC in oral fluid (OF) has been associated with a strong contamination of the oral cavity  
147 during smoking and to a recent cannabis use.  $\Delta 9$ -THC and its metabolites are poorly excreted from the blood  
148 and tissues into this matrix. In line with these observations, analysis of OF revealed very high concentrations of  
149 THC in OF just after cannabis smoking, while 11- hydroxy-THC (11-OH-THC) was not detected and only trace  
150 amounts of THCCOOH were found when measured<sup>17</sup>. Studies that used intravenous administration of THC

151 have suggested that the transfer of THC from the blood into OF is limited<sup>18</sup>. Since THCCOOH is not known to  
152 be present in cannabis smoke, its detection in OF could only result from active cannabis consumption.  
153

154 Breath may offer an alternative matrix for testing for recent driving under the influence of cannabis, but is  
155 limited to a short detection window (0.5–2 h)<sup>19</sup>. In the present study, we will use the SensAbues breath  
156 collection device and a validated liquid chromatography–tandem mass spectrometry (LC-MS/MS) method to  
157 quantify breath cannabinoids in study participants following controlled smoked THC administration. The time of  
158 last cannabis use from the breath  $\Delta$ 9-THC concentration will be correlated with that from blood levels of this  
159 cannabinoid over 2 hours after cannabis intake. In a previous study, no breath sample tested positive for  
160 THCCOOH<sup>19</sup>.  
161

## 162 RESEARCH DESIGN AND METHODS

### 163 Participants

164 Two hundred and forty healthy individuals will be recruited with the intention to study 180 participants who  
165 meet inclusion/exclusion criteria and ultimately provide complete data. Participants will have used cannabis at  
166 least four times in the preceding month, as determined by self-report. They will be randomized to receive either  
167 0.02% (placebo; n = 60), 5.9% (n = 60), or 13.4% (n = 60)  $\Delta$ 9-THC.

### 168 Visits

169 Participants will complete a screening interview and baseline visit, and an experimental visit on separate days  
170 as part of this study to include the following:  
171

172 • Screening + Baseline visit (Day 1 – a 4-hour visit). A review of medical and substance use history, as  
173 well as a safety evaluation (including relevant labs, if indicated by findings on history or physical exam). In  
174 addition, participants will complete a series of driving simulations in order to orient them to the simulator,  
175 establish baseline levels of performance and minimize the effects associated with repeated exposure to the  
176 simulations (practice effects). Participants will also be assessed for far visual acuity (ETDRS eye chart), color  
177 vision (Ishirara), and contrast sensitivity (Pelli-Robson Chart).  
178

179 • Experimental visit. After completing a pre-smoking driving simulation and iPad testing, participants will  
180 inhale smoked cannabis with either 0.02% (placebo), 5.9%, or 13.4%  $\Delta$ 9-THC beginning of the day. They will  
181 then complete driving simulator assessments, iPad-based performance assessments, and fluid draws (blood,  
182 saliva, breath) as indicated in Table 1 below. By conducting repeated assessments following intake of the  
183 study drug, we will be able to determine at what point participants no longer exhibit acute effects for each of  
184 the drugs. The acute effects will be measurable using driving simulation, field sobriety tests, and  
185 neuropsychological testing via an iPad.  
186

187 Subjects will undergo a urine drug screen and breathalyzer for alcohol and drugs at the beginning of the  
188 screening/baseline visit and the experimental visit. In addition, an oral fluid sample will be run for the presence  
189 of delta-9 THC using a testing device (Draeger 5000, Houston, TX) employed by some law enforcement  
190 officers to detect recent cannabis use. An oral fluid value of > 5ng suggests recent use. Thus, should the oral  
191 fluid sample indicate > 5ng THC, the assessment may be canceled and rescheduled, since participants are to  
192 have abstained from use for at least 2 days. Additional samples may be sent for confirmatory testing if the  
193 results of the urine drug screen or Draeger are inconsistent with participant report. (Note that since there is no  
194 practical way to confirm non-use in recent days [short of an inpatient setting], we will also be collecting blood  
195 samples prior to intake of study cannabis and perform a confirmatory analysis with mass spectroscopy/gas  
196 chromatography. This may later be considered in our analyses of study findings.)  
197

**Table 1.** General Outline Assessment of Study Timeline (in minutes)

|                     | Pre | Smoke Cannabis<br>Cigarettes | 0 | 30 | 60 | 90 | 120 | 170 | 210 | 255 | 280 | 320 |   |
|---------------------|-----|------------------------------|---|----|----|----|-----|-----|-----|-----|-----|-----|---|
| Vitals              | X   |                              | X |    |    | X  |     | X   | X   |     |     |     | X |
| OF Collection       | X   |                              | X |    |    | X  |     |     | X   |     | X   |     |   |
| Breath Collection   | X   |                              | X |    |    | X  |     |     | X   |     | X   |     |   |
| Blood Draw          | X   |                              | X |    | X  | X  | X   | X   | X   | X   | X   | X   | X |
| Driving Simulations | X   |                              |   | X  |    | X  |     |     | X   |     | X   |     |   |
| SFSTs               | *   |                              |   |    | X  |    |     | X   | X   |     | X   |     |   |
| iPad test           | X   |                              |   |    | X  |    | X   |     |     |     | X   |     | X |

**Supply and Administration of Cannabis**

Cannabis will be harvested at the University of Mississippi under the supervision of the National Institute on Drug Abuse (NIDA). Our IND application for cannabis as an obligatory part of federal regulations for obtaining NIDA cannabis has been approved by the FDA (for details, please see below in Section 11 under Procedures Preparatory To Research). NIDA will be able to provide bulk cannabis for this study in the concentrations mentioned above. Bulk placebo is made from whole plant with extraction of cannabinoids and has the natural smell and appearance of the active cannabis. After overnight delivery, the bulk cannabis will be stored in a freezer securely bolted to the floor of the UCSD Research Pharmacy at Hillcrest. Further precautions against theft of the study drug included limited password access to the pharmacy, with a state-of-the-art entry detection system and a direct connection of the alarm system of the room housing the freezer to the Hospital Police Department.

After informed consent is obtained and eligibility determined participants will be scheduled for a baseline session and one, 8-hour experimental session at the CMCR (220 Dickinson St, San Diego, CA 92103). Participants will receive 5.9%, 13.4%, or placebo (0.02% THC) cannabis cigarettes at their visit. Group assignment will be assigned using a permuted blocks randomization with stratification by prior cannabis exposure (frequent user [ $\geq 4x$  per week] versus occasional user [ $\leq 4x$  per week]). The allocation schedule will be kept in the pharmacy and concealed from other study personnel. Patients and assessors will be blinded to group assignments. The cigarettes will be stored in a freezer at  $-20^{\circ}\text{C}$  until the day before use. At least 1 hour before the study session, enough bulk cannabis (0.7 g) to roll one marijuana cigarette will be thawed. The cannabis cigarette will be hand-rolled by a licensed clinician before the study session. The adhesive seal on the rolling paper will be activated with drops of sterile water.

An ad libitum cannabis smoking will be utilized, with a maximum smoking time of 10 min or until the cigarette is smoked until the participant cannot hold it longer using clips. This will likely insure that enough THC is consumed to allow OF concentrations of this cannabinoid to be accumulated while, at the same time, protecting the participant from their finger being burned from the proximal end of the cigarette. In practice, the participant will be instructed to “*Smoke the cigarette the way you do at home to get high. You may take up to 10 minutes.*”

However, it will not be mandatory for participants to inhale enough cannabis to incinerate the cigarette until they can no longer hold it. As an alternative, the participant may signal by raising their hand that they are not tolerant of further dosing for whatever reason. It has been stated, “An experienced cannabis smoker can titrate and regulate dose to obtain the desired acute effects and to minimize undesired effects”<sup>20</sup>. Though not mandatory to incinerate the cigarette to the proximal tip, a minimum of 4 puffs will be required for a participant to remain in the study. Otherwise, we run the risk of having someone undergoing assessments without being under a minimum amount of intoxication from cannabis.

A nurse will continuously supervise the participant during the smoking session through a viewing window in an adjoining room with an intercom and insure that they are progressing safely. A physician will be readily available for consultation.

## Assessments during Experimental Visits

**Driving simulations:** Simulation hardware consist of a 3-screen, wide field-of-view monitor setup, steering wheel, and accelerator and brake pedals (Figure 1). The fully interactive simulations will assess lane tracking (standard deviation of lateral position [SDLP], or “weaving”), response to divided attention stimuli (accuracy, response time), car following, and performance during scenarios simulating routine driving as well as crash avoidance situations.

Participants in the simulator study will also be assessed for far visual acuity (Snellen Visual Acuity eye chart), color vision, and contrast sensitivity (Vistech Contrast Sensitivity (Pelli-Robson Chart)). Participants will complete an orientation and practice drives prior to the initial simulation, in order to familiarize them with the controls and roadways.

- Lane Tracking/Divided attention: Participants will be instructed to maintain their lane position and speed, and respond to divided attention stimuli on an adjacent iPad. The primary outcomes are standard deviation of lateral deviation (SDLP), latency and accuracy on the divided attention tasks, and speed deviation. SDLP is a measure of how well subjects maintain their lane position, providing an index for each subject’s road tracking error and ability to control the lateral motion of the car. It is primarily controlled by automatic information processing and outside of conscious control. SDLP has been shown to be sensitive to the effects of drugs in both on-road and simulator studies<sup>21-25</sup>. It has been examined in individuals under the influence of alcohol, marijuana, and MDMA, as well as with neurologic populations<sup>26-30</sup>. SDLP has also demonstrated good test-retest reliability over short and long-term follow-ups<sup>31-34</sup>.
- The Divided Attention task will be a modification of the Surrogate Reference Task (SuRT)<sup>35</sup>. The primary outcomes on this component are response latency and accuracy on the mSuRT tasks. The mSuRT is a visual perceptual task which presents subjects with an approximately 8" touch screen filled with circles and requires participants to point to a target circle (Figure 1). The level of difficulty is varied by changing the ratio of the size of the distractor circles and target circles. The equipment will be to the side of the monitor. The SuRT is a measure of performance under high cognitive load and controlled processing, in that participants must divide their attention among three stimuli (roadway, speedometer, and events in the periphery), and is reflective of the workload generated by a real task (e.g., a GPS system). Face valid tasks such as navigation destination entry draw attention away from the road in highly variable ways (i.e. there tend to be large differences in how people attack problems associated with complex interactions). On the other hand, surrogate or structured tasks allow us to look at changes in attention in a more controlled fashion. This will enable us to address how participants under the influence of cannabis vary allocation strategies with workload.

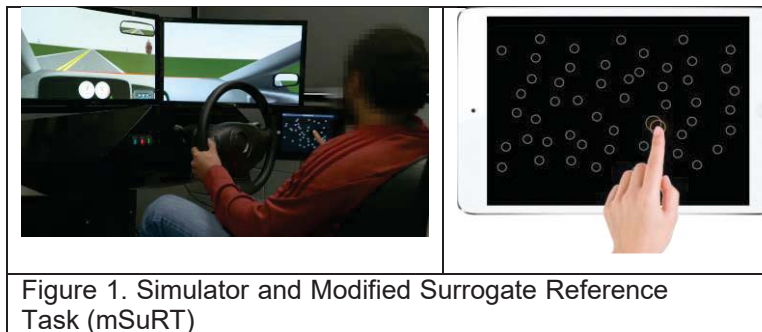

- Car Following: The primary outcomes are (1) coherence between the participant and lead cars (a general correlation [0–1] of the participant’s ability to accurately track the speed variations of the lead car); (2) time delay (or the reaction time to changes in the lead car’s speed); and 3) distance from the lead car. The subject is to adjust his/her speed to a lead car that speeds up and slows down according to a sinusoidal wave.

- 297
- 298
- 299
- 300
- 301
- 302
- 303
- 304
- 305
- 306
- 307
- 308
- 309
- 310
- 311
- 312
- 313
- 314
- 315
- **Crash avoidance/decision-making:** In order to assess treatment effects during routine and non-routine events we will include scenarios addressing 1) the “yellow light dilemma”, wherein individuals need to respond to a yellow light onset by abruptly braking (risking a rear-end collision), or go through the intersection (risking running a red light), and 2) crash avoidance. Participants will be instructed to drive 45mph, and will encounter 8 green traffic lights, 4 of which will switch to yellow. These will be randomized within each drive. Consistent with California law<sup>36</sup>, the yellow light phase (time before the yellow light turns red) will be 4.3s. The time available to perceive and respond to the yellow light will be held constant for all participants by controlling initiation of the yellow light by using the vehicle’s velocity to determine the time-to-location (start of intersection). This will be set at 3.4, 3.0, 2.7 and 2.2s, settings which in previous studies have shown to elicit a range of responses (running the yellow light, stopping)<sup>37,38</sup>. The primary outcomes will be stop/go percent and perception-reaction time (PRT; time of yellow onset to start braking or accelerating through the intersection), although a number of additional behavioral outcomes will be of interest. The simulation will also include a crash avoidance scenario in which the participant drives down a visually complex roadway (moving cars, pedestrians) and encounters the sudden appearance of a pedestrian, or car pulling out, in the roadway. Primary outcomes are the PRT to the incursion, and whether a collision occurs. Since an important aspect of this task is the unexpected nature of the event, the incursion point and object (vehicle, pedestrian) will vary across assessments (but be consistent across all participants).

316 Additional components of the simulation will include left hand turns across traffic (assessing gap acceptance),  
317 freeway off ramps, merging into traffic, and brief audio driving instructions (requiring intact short-term memory).  
318

319 Overall driving performance will be the Composite Drive Score. The Composite Drive Score  
320 incorporates the key variables from the more controlled scenarios above (Lane Tracking/Divided Attention and  
321 Car Following) and combine them in a manner to create a single score. We will create a baseline anchor for  
322 performance based upon the performance of all participants during their pre-smoking drive. Subsequent  
323 Composite Drive Scores will use this as the basis for developing the change score (from pre-smoking) at each  
324 timepoint.

325 In order to accomplish this, z-scores will established based upon the pre-smoking simulator  
326 performance, using the mean and standard deviation on each score for all participants. Z-scores for each  
327 participant will be calculated by subtracting the group mean score from the participant’s score and dividing that  
328 by the group standard deviation (so that, in the end, at the pre-smoke driving the Composite Drive Score for  
329 the entire sample will have a mean z-score of 0, with a standard deviation of 1). Higher z-scores at each  
330 timepoint will indicate worse performance. When examining the change in Composite Drive Score, a higher  
331 score will indicate a decline in performance (e.g., Time 2 minus Time 1). The Composite Drive Score will be  
332 comprised of: mSuRT task (SDLP, Speed Deviation, correct hits on SuRT) and Car Following (coherence).  
333

### 334 **Drug Recognition Expert Field Sobriety Test**

335 Several psychophysical tests from among those used by Drug Recognition Experts (DRE) for assessment of  
336 driving under the influence of cannabis will be performed.  
337

- Modified Romberg test (mROM)
- Lack of Convergence (LOC)
- Finger-to-Nose (FTN)
- Walk and Turn (WAT)
- One Leg Stand (OLS)

343  
344 To insure proper administration, field sobriety tests will be performed by DRE instructors.  
345

### 346 **Performance-based tablet assessments**

347 The following will be performed using an iPad with software designed by Digital Artefacts LLC (Iowa City, IA)  
348 based upon collaboratively-established specifications. The iPad assessments will take approximately 10  
349 minutes:

- Lane Tracking. This test assesses the participant's ability to adapt to an error signal in a first-order compensatory task, and has been shown to be sensitive to the effects of  $\Delta 9$ -THC<sup>14,39-41</sup>. This will be assessed by the participant keeping a solid circle within two boundary lines by swiveling the iPad. The participant must overcome built-in error in horizontal deviation.
- Dual Attention. The participant will follow a moving target (square) with a stylus, with a secondary square located elsewhere on the screen. The secondary stimulus will change colors and shapes. When the secondary square turns a specific color, the participant is to switch over to tracking that stimulus.
- Time estimation. Cannabis can affect time perception and estimation. Deficits in temporal processing could have significant implications for driving, for example in estimating the amount of time available to pass through a yellow light, or anticipating cross-traffic. We will thus administer a brief measure of time estimation. As recommended by Sewell et al.<sup>42</sup>, we will use an approach that minimizes the use of subvocal counting, which may artificially decrease variation that might occur during real-world multi-tasking. Five trials, with randomly generated durations ranging from 5 to 30s (e.g., 7, 11, 29, 14, 23 seconds), will be generated. During each assessment, participants will be presented with the letter M in random parts of the iPad screen. The participant is then to count the number of "M"s that appear on the screen, at which point he/she is to select the number of "M"s and the amount of time that has elapsed. The primary outcome is the ratio of estimated time to actual time.
- Balance. This has proven to one of the more sensitive, but challenging, aspects to the DRE Field Tests since sway is subjectively determined by the officer. During the modified Romberg Test, forward-backward, and lateral postural sway will be assessed via the accelerometer and gyroscope features of a TI Simple Link Sensor Tag strapped to the back of the participant, using a Velcro belt.
- Visual Spatial Memory Learning Test. Cannabis can affect memory acutely<sup>13,43,44</sup>. We will assess short term memory using a visual-spatial learning test (VSLT). This test is modeled after other tests of visuospatial memory (e.g., the Brief Visuospatial Memory Test-Revised, Visual Spatial Learning Test). The test requires the subject to a) memorize 4 designs that are difficult to verbally encode, b) recognize them among a group of 8 designs (5 foils) and c) recall the correct placement of these designs on a 3 X 3 matrix. Participants will complete three trials. Since there is evidence that cannabis effects are more pronounced the longer the delay between presentation and recall<sup>45</sup>, the delay between stimulus presentation and time to recall will be 4, 12, and 24 seconds for the successive trials. The score is the number of figures correctly identified and placed.

### Success of Blinding

Twice during the experimental session, we will ask questions about successful blinding of the study drug. The method will be to ask participants "Which treatment do you think you received (or were assigned to)?"

- I strongly believe I received real marijuana
- I somewhat believe I received real marijuana
- I do not know
- I somewhat believe I received placebo ("like a sugar pill")
- I strongly believe I received placebo ("like a sugar pill")

### Psychoactive Side Effects During Driving Simulation Sessions and After Consuming the Study Drug

We will ask participants to evaluate their feeling side effects from cannabis (stoned, high, like the drug effect, feel impaired to drive) using VAS 0 to 100 scales with appropriate anchors.

### Assays for $\Delta 9$ -THC in Blood

In habitual, daily users, plasma  $\Delta 9$ -THC concentrations range from 1.0 to 11.0 ng/ml and are maintained by sequestration of the drug from the tissues<sup>46</sup>. This residual blood concentration makes setting thresholds for drug-driving legislation difficult because of the variability in the determination of concentration across individuals. Selecting a high cutoff will miss many impaired occasional users while selecting a low cutoff may pick up residual concentrations in frequent users. But there is clearly a case for defining such levels. Determining minimum blood, saliva and breath THC concentrations at which a driver becomes sufficiently



impaired to be unable to safely drive a vehicle is of particular concern given the increasing medicinal use of the drug. International legislation for driving under the influence of drugs (DUID) is based on either a proof of impairment or a per se approach. For the latter, this can be either zero-tolerance or based on concentration limits such as those used for alcohol.

During the driving simulator assessment, we will determine blood levels after administration of the study drug in order to evaluate the effects of  $\Delta$ 9-THC and on driving and cognition. An arm vein will be cannulated with an indwelling catheter. Blood will be collected in grey top (EDTA) vacutainer tubes. The blood will be transferred to 1.8 ml cryovials and aliquots will be stored at  $-70^{\circ}\text{C}$ . Up to 108 cc or 21.6 teaspoons of blood will be collected.

$\Delta$ 9-THC and metabolites will be quantified using isotope dilution ultra-performance liquid chromatography (UPLC) and tandem mass spectrometry (MS/MS) using methodologies similar to what have been published. Briefly, deuterium labeled internal standards will be added and proteins will be precipitated using acetonitrile.  $\Delta$ 9-THC and CBD will be isolated using solid phase extraction and analyzed using electrospray ionization.  $\Delta$ 9-THC will be analyzed using positive ion electrospray while negative ion ESI will be used for CBD using Waters Xevo TQS equipped with Waters Acquity UPLC. The limit of quantification (LOQ) will be 0.5 ng/mL of each of the components in whole blood. Our laboratory at UCSD has been using similar methodologies to accurately quantify small molecules for many years<sup>47</sup>.

#### Identification of Recent Cannabis Intake Using Whole Blood

Human whole-blood cannabinoid data following cannabis smoking may assist in the identification of recent cannabis intake<sup>48</sup>. It has been hypothesized that several cannabinoids (e.g., THC-glucuronide, cannabidiol and cannabinol) might be useful for estimating the last time of cannabis intake. This follows from the finding that analytes of these cannabinoids, at observed  $C_{\text{max}}$ , were not detected beyond 2 h after smoking, rendering them possible candidates for markers of recent cannabis smoking. However, they are not universally detectable in everyone after consuming cannabis; whole-blood (plasma) detection rates were as shown below in one study that involved occasional smokers (cannabis smoking at least twice monthly for 3 months before entry)<sup>48</sup>.

| Analyte         | Whole blood | Plasma |
|-----------------|-------------|--------|
| THC-glucuronide | 50%         | 80%    |
| Cannabidiol     | 60%         | 80%    |
| Cannabinol      | 80%         | 90%    |

These somewhat low observed detection rates render THC-glucuronide, CBD and CBN an inclusionary, but not exclusionary, marker for recent cannabis intake at a 0.5 ng/ml limit of quantification. Furthermore, CBD and CBN were not detectable after 1 h in either plasma or blood (limits of quantification [LOQ 1.0 ng/ml]). CBD and CBN had similar detection windows in whole blood and plasma, with CBN more prevalent than CBD between 0.25 and 1 h. CBD and CBN are amenable to GC-MS analysis, are often readily extracted by current mixed-mode solid-phase extraction procedures, and have commercially available deuterium-labeled internal standards, unlike cannabinoid glucuronides<sup>48</sup>. However, concentrations of these analytes in cannabis vary depending on chemovar<sup>49</sup> and storage time and conditions<sup>50</sup>, potentially altering detection rates. Additionally, these cannabinoids are present in cannabis smoke<sup>51,52</sup> and, unlike THC-glucuronide, could possibly be detected in oral fluid. If detection limits improve for these minor cannabinoids (currently LOQ 1.0 ng/ml), further study could suggest potential cutoffs and analytical approaches for confirming these analytes as markers of recent cannabis intake. In the present study, we will analyze THC-glucuronide in whole blood as well as in oral fluid and breath to see if this cannabinoid would offer a recognizable marker of recent use of cannabis.

#### Assays for Oral Fluid

Oral fluid (OF) is becoming increasingly popular in many areas of drug testing as a diagnostic fluid, partly due to the ease and noninvasiveness of collection<sup>53</sup>. Oral fluid analysis for  $\Delta$ 9-THC and other drugs of abuse are

451 being reported in roadside testing<sup>54,55</sup>.

452  
453 OF samples will be collected a few minutes before inhalation (t = 0 h) and afterwards. Specimens will be  
454 stored for a few hours at room temperature before refrigerating. We will employ the Quantisal™ collection  
455 device (Alere Inc., San Diego, CA) to collect and store saliva samples. Using ultra-performance liquid  
456 chromatography (UPLC) and tandem mass spectrometry (MS/MS), the levels of Δ9-THC in the saliva samples  
457 will be determined. We will base the OF LC/MS/MS assay on the method developed for blood analysis after  
458 optimizing extraction conditions for OF specimens. The OF Δ9-THC concentrations will be correlated with that  
459 from blood over 3.5 hours after cannabis intake.

#### 461 **Assays for Breath Specimens**

462 Exhaled breath has recently been identified as a matrix for the detection of drugs of abuse including Δ9-THC  
463 <sup>56</sup>. This technology is based on a collecting device, the Drug Trap® (SensAbues AB, Sweden), with a filter  
464 which traps aerosols from breath. These aerosols mimic the blood in terms of the content of certain  
465 substances including Δ9-THC<sup>56</sup>. However, although exhaled breath may offer an alternative body material for  
466 identifying recent driving under the influence of cannabis, currently its sensitivity is limited to a short detection  
467 window (0.5–2 h)<sup>19</sup>. In that study, the number of individuals who had THC in their breath was reported. Among  
468 chronic smokers (n = 13), all breath samples were positive for THC at 0.89 h, 76.9% at 1.38 h, and 53.8% at  
469 2.38 h, and only 1 sample was positive at 4.2 h after smoking. Among occasional smokers (n = 11), 90.9% of  
470 breath samples were THC-positive at 0.95 h and 63.6% at 1.49 h. One occasional smoker had no detectable  
471 THC.

472  
473 Breath samples will be collected at baseline and then approximately 22, 99, 227 and 298 minutes post  
474 smoking with the SensAbues device (over a 3 min collection period).

475  
476 SensAbues devices contain a mouthpiece and polymeric filter pad enclosed in a plastic collection chamber<sup>56</sup>.  
477 Devices protect against oral fluid contamination during sampling with barrier ledges inside the mouthpiece<sup>56</sup>.  
478 Participants will be asked to breathe normally, inhaling through their nose and exhaling through the SensAbues  
479 mouthpiece during sampling. After this is completed, the collection device is carefully opened and the filter  
480 removed with forceps, placed inside a small plastic bag and frozen at -70 degrees C. We will not leave the filter  
481 inside the SensAbues device and will insure that oral fluid does not get onto the filter. Food and beverage  
482 intake will be restricted 10 min before each collection. The collections will occur in a different room from the  
483 smoking room.

484  
485 Using ultra-performance liquid chromatography (UPLC) and tandem mass spectrometry (MS/MS), breath  
486 concentrations of Δ9-THC will be determined using the basic LC/MS/MS procedures developed above after  
487 optimizing extraction conditions for measurement of THC from the OF collection device. The breath Δ9-THC  
488 concentrations will be correlated with that from blood levels of this cannabinoid over 2 hours after cannabis  
489 intake.

490  
491 The following specimens will be obtained:

- 492  
493 a. For blood target compounds will include (-)-trans-Δ9-tetrahydrocannabinol (THC), 11-hydroxy-Δ9-  
494 tetrahydrocannabinol (11-OH-THC), 11-nor-9-carboxy-delta-9-tetrahydrocannabinol (THC-COOH),  
495 Δ9-tetrahydrocannabinol-glucuronide (THC-glucuronide), cannabidiol (CBD), and cannabinol CBN.  
496 Blood specimens in grey top (naf) tubes
- 497 b. For oral fluid target compounds will include (-)-trans-Δ9-tetrahydrocannabinol (THC), cannabidiol  
498 (CBD), and cannabinol CBN.
- 499 c. For breath target compounds will include (-)-trans-Δ9-tetrahydrocannabinol (THC)

#### 501 **Statistical Analysis Plan**

502 All tests will be two-sided and deemed significant if p<0.05, unless specified otherwise. Parallel design  
503 is assumed for the total sample N=180 with N=60 subject per group, where groups are defined as

control/placebo (0.02%  $\Delta$ 9-THC), 5.9%  $\Delta$ 9-THC, and 13.4% THC. Baseline demographic, medical, and psychiatric characteristics will be reported separately for each group as mean (standard deviation) or median (interquartile range) for numeric measures and as N (percent, %) for categorical measures. The baseline characteristics will be compared between groups using ANOVA for numeric variables and Chi-square test for categorical variables. Power transformations of skewed variables or non-parametric alternatives will be used, where appropriate. All assumptions will be checked prior to testing. Differences in baseline characteristics between the groups are not expected due to randomization. However, if they happen by chance, variables that differ between the groups will be considered as covariates in multivariable methods, as appropriate.

The primary analysis will focus on testing aims and initial hypotheses outlined above. The primary variables of interest will be measured at multiple time points with the goal of assessing how they change throughout the day, thus we will use statistical methods appropriate for analysis of data in repeated measures and longitudinal study designs.

Demographic and other relevant characteristics will be compared between groups using ANOVA, Kruskal-Wallis test, chi-square test, and Fisher's exact test as appropriate. Two-group comparisons will be carried out using t-test (or Wilcoxon), chi-square test, or Fisher's exact test. To meet the assumption of normality, some continuous variables may be standardized. Effect sizes for continuous outcomes will be estimated by Cohen's d or by Cliff's delta. Confidence intervals (CI) at 95% level will be calculated for all effect sizes. Confidence intervals reported with p-values adjusted for multiple testing will also be corrected using false discovery (FDR) method.

Generalized least squares models will be used for numeric outcomes with covariance structure selected by minimum Akaike Information Criterion (AIC). Poisson and logistic regression models with generalized estimating equation (GEE) method will be used for discrete and binary outcomes, respectively. Time will be treated as a factor to accommodate non-linear changes in the outcomes. Treatment will first be considered as a three-level variable - Placebo, 5.9% THC, and 13.4% THC. For all models, three terms will be included: treatment, time (5 time points), and treatment-time interaction. For effect sizes estimating differences at multiple time points, correction for multiple comparisons will be applied using false discovery rate (FDR) method (secondary analyses only).

**Power.** For power calculations, it was assumed that the placebo group will show minimal changes in Composite Drive Score (CDS) over time and that the 13.4% THC group will show a worsening in CDS immediately after smoking cannabis with a gradual return to expected CDS levels afterwards. Cohen's d will be used as an estimate for the effect size for measuring the difference in changes in CDS from baseline (pre-cannabis) to the time point with the assumed largest differences between the two groups. Under these assumptions, power for finding a significant difference in changes in CDS between the 13.4% THC group and the placebo was estimated using 1000 simulations, which showed 80% power to detect Cohen's d=0.33 or larger with significance level  $\alpha=0.05$ . The estimates suggest adequate power to detect likely changes associated with cannabis smoking. For example, in our previous study participants smoked cigarettes with 4% THC, and 2 to 3 hours post-smoking evidenced effect sizes between 0.36 and 0.47 when comparing changes in SDLP between placebo and active THC.

## HUMAN SUBJECTS

**Total number of participants to be enrolled:** We will recruit 240 potential participants to eventually enroll 180 participants who meet inclusion/exclusion criteria and provide complete data. Eligible participants will return for one experimental visit to receive one of the three types of cannabis to be evaluated.

**Age:** participants must be aged 21-55 (upper limit is to minimize potential confounding by medical conditions associated with aging). Because of the problems inherent in the use of cannabis in children and adolescents, we will not enroll individuals below the age of 21.

**Gender:** Both males and females will be recruited.

**Ethnic background:** Given the diverse ethnic background of San Diego (see Figure 2 below), we should be able to recruit subjects from multiple ethnic backgrounds.

Figure 2

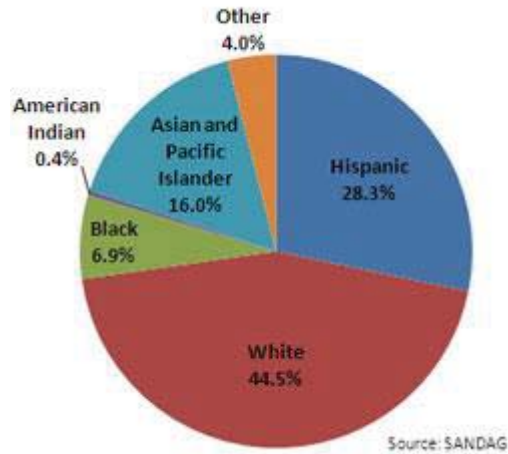

### Inclusion criteria

- Age greater than 21
- Must be a licensed driver and driven a minimum of 1,000 miles in the past year
- Must be a regular cannabis smoker ( $\geq 4$  times in the past month)
- Willing to not disclose details of the simulator and iPad based assessments

### Exclusion criteria

- History of traumatic brain injury.
- At the discretion of the examining physician, individuals with significant cardiovascular, hepatic or renal disease, uncontrolled hypertension, and chronic pulmonary disease (e.g., asthma, COPD) will be excluded.
- Unwillingness to abstain from cannabis for:
  - 2 days prior to screening visit (so driving simulation will not be impaired)
  - 2 days prior to experimental visit (2-3 half-lives of THC)
- Positive pregnancy test
- A positive result on toxicity screening for cocaine, amphetamines, opiates, and phencyclidine (PCP) will exclude individuals from participation. However, a positive result for a prescribed or recommended medication (cannabis) will not be exclusionary.
- Substance Abuse History: Individuals with current substance use disorders<sup>57</sup> as assessed using the Drug Abuse Screening Test (DAST) and Alcohol Use Disorders Identification Test (AUDIT).
- Schizophrenia, Bipolar Disorder with a history of mania, other psychotic disorder, current suicidal ideation or past history of suicide attempt.
- Suicidality. The Beck Depression Inventory-II (BDI-II) will be administered during the in-person screening evaluation. Participants will be excluded from the study if their BDI-II score is greater than or equal to 17 or if suicidal ideas are endorsed on the BDI-II assessments. Community referrals will be made when appropriate.
- Must be willing to be transported by cab or have a friend/family member drive them home after experimental session
- Inability to complete study procedures (i.e. poor veins, unwillingness to be transported home by taxi or friend)

### Recruitment and Procedures Preparatory to Research

Subjects will be recruited from the community. CMCR outreach personnel will maintain a presence at many community events, and give presentations at support and other services groups.

604 **Methods to identify and recruit research study participants:** include an education campaign utilizing  
605 newspaper advertisements; a system to promote referrals from health care providers, case managers, and  
606 service agency staff; and direct contact with potential participants via outreach conducted in community  
607 settings, clinics, and hospital venues. Educational materials are distributed both through traditional (e.g.,  
608 newsletters, newspapers, community based organizations, doctor's offices and medical clinics) and "non-  
609 traditional" (e.g., Craig's list, bookstores, pharmacies, nutritionists, massage therapists, and social  
610 organizations) venues. Referral networks are built and maintained through community meetings, events, and  
611 activities. Outreach is conducted via informational tables at health fairs, community events and community  
612 venues including physician offices and medical clinics.

613  
614 Recruitment will also occur through the CMCR where participants are given the option on their consents to be  
615 contacted for future studies. We will only contact those individuals who have consented to be contacted for  
616 future studies on their CMCR-affiliated consent document – or who have signed a screening consent for a  
617 CMCR-affiliated IRB approved project.

618  
619 We will add an online survey using the Platinum Edition of Survey 2 Monkey to screen potential subjects. The  
620 Platinum Edition of Survey Monkey is HIPAA compliant – please see  
621 <https://www.surveymonkey.com/pricing/details/>.

### 622 **Pre-Screen Phone Call**

623 Volunteers will be screened via telephone interview and, as appropriate, via face-to-face assessment.  
624 Telephone screening (respondents blind to selection criteria) will assure volunteers meet general age and  
625 medical criteria.

626  
627  
628 **Procedures Preparatory To Research** During the start-up phase we will establish key infrastructure  
629 components, as well as develop the assessment tools needed to initiate the clinical research. These include:

- 630 a) IND 131268 for the use of cannabis in this study was approved by the Food and Drug Administration  
631 (FDA). The National Institute of Drug Abuse (NIDA) provided a Letter of Authorization for the FDA to  
632 view their drug supply program Master Drug File and a letter acknowledging that they would supply the  
633 cannabis for this protocol. Approval from the DEA is pending UCSD IRB approval. This is now in  
634 progress. The Regulatory Panel of California has approved the protocol.
- 635 b) Training of staff.
- 636 c) Development/refinement of  $\Delta 9$ -THC assays. To ensure that analytical measurements of  $\Delta 9$ -THC and  
637 metabolites are accurate, precise, and reproducible using isotope dilution ultra-performance liquid  
638 chromatography (UPLC) and tandem mass spectrometry (MS/MS), we will conduct initial studies  
639 targeting (-)-trans- $\Delta 9$ -tetrahydrocannabinol (THC), 11-hydroxy- $\Delta 9$ -tetrahydrocannabinol (11-OH-THC),  
640 11-nor-9-carboxy- $\Delta 9$ -tetrahydrocannabinol (THC-COOH) and cannabidiol (CBD) in whole blood.  
641 The target limit of quantification (LOQ) will be 0.5 ng/mL of each of the components in whole blood.
- 642 d) Driving simulation development. This includes purchasing and setting up simulator hardware, as well as  
643 modifying simulations to best assess the types of driving-related difficulties likely to occur when under  
644 the influence of THC.
- 645 e) Development of a suite of tablet-based tests for a potential performance-based field sobriety test.  
646 Based upon the extant literature regarding the cognitive effects of  $\Delta 9$ -THC and impact on driving, we  
647 will develop a suite of approximately 5 tests as potential performance-based measures of impaired  
648 functioning for use in the field. Data generated by the clinical research will inform future decisions  
649 regarding which tests are the most sensitive to such impairments.

### 650 **Informed Consent**

651 Informed consent will be obtained from all individuals participating in this study. All recruiters at the CMCR  
652 have tremendous experience with the informed consent process and sensitivity to the impairments that may be  
653 associated with substance use and psychiatric disorders. Recruiters who have undergone CITI and HIPAA  
654 training will explain the study to potential participants. They will have sufficient knowledge of the study to  
655 answer any questions regarding the study. They will explain the research activity, how it is experimental (e.g.,  
656

a new drug, extra tests, separate research records, or nonstandard means of management, such as flipping a coin for random assignment or other design issues). They will inform the human subjects of the reasonably foreseeable harms, discomforts, inconvenience and risks that are associated with the research activity. During the informed consent procedure, patients will be informed that all data obtained in the interviews is strictly confidential, and that no information will be shared with others without the participant's express written approval. To enhance comprehension, the informed consent documents are written at the 8th grade level of language. Written informed consent will be obtained from each participant prior to enrollment in the study. No individuals from vulnerable populations will be recruited. Participants will be given a copy of the consent document, as well as the "Experimental Subject's Bill of Rights" to keep.

The informed consent document will contain a section informing the subjects that by signing the consent, they are agreeing that data collected (e.g., cognitive tests, interviews, questionnaires, plasma, saliva) in other IRB-approved CMCR studies that they may be enrolled in may be used in this study.

Similarly, the informed consent document will include a statement informing subjects that data and samples gathered in this study may be shared with other CMCR investigators conducting IRB-approved research. Since future research using banked samples from this study could include genetic analysis the appropriate language from the DNA and Informed Consent Fact Sheet has been included in the consent.

Additionally, Protected Health Information (PHI) will not be obtained without a separate "Authorization to Obtain Medical Records" consent.

Potential volunteers will be pre-screened via telephone interview by members of the PAR and, as appropriate, via face-to-face assessment by a clinician at the Screening Interview. Telephone screening (respondents blind to selection criteria) will assure volunteers meet general age and medical criteria.

For telephone pre-screening, we are applying for Waiver of Documented Consent. We will obtain oral consent. The pre-screening interview presents no more than minimal risk of harm to subjects. Data collected during the pre-screen will be used for the purposes of determining eligibility and for comparing the characteristics of participants who were enrolled in the study to those who were deemed ineligible. Participant identifiers collected during pre-screen will be retained so that any recruiter who speaks with the individual will have access to the information. Identifying information is stored encrypted on a physically segregated internal network with absolutely no links to the de-identified scientific data. Only select staff members have access to this database.

A signed main consent form and HIPAA form will be obtained at the Screening Interview.

## **Potential Risks**

### **Likely**

- lethargy
- difficulties with balance
- eye irritation
- throat irritation
- increased heart rate
- possible low blood pressure
- reversible problems with your appetite
- slight nausea or queasiness from the driving simulation

### **Less Likely**

- dizziness
- some change in your mood (good or bad)
- loss of memory

- decreased ability to concentrate or think properly
- nausea to the point of vomiting, from the driving simulation

#### Rare But Serious

- head and chest pressure
- disorientation
- agitation
- combativeness
- incoherence
- visual hallucinations
- panic attacks
- fainting

All of the above are potentially less likely when randomized to placebo.

**Physical harm:** Risks of inhaled cannabis products may include psychomotor coordination difficulties, eye irritation, throat irritation, increased heart rate, possible hypotension, and reversible appetite/mood/memory/cognition effects.

There may be some discomfort when blood samples are taken, and there is a small risk of bruising, infection, or inflammation at the site at which the needle is inserted. We will be taking up to approximately 21 teaspoons of blood for the purposes of this study.

- **Psychological harm:** anxiety and/or emotional distress may result from questions asked during assessment or as a result of the time taken in the assessment process. Additionally, some iPad tests may require concentrated effort and may be frustrating for the subject to complete.
- **Legal harm:** We will be asking sensitive questions about use of cannabis. Access to such material for legitimate research purposes is generally acceptable, as long as the researcher protects the confidentiality of that information. We will use all available methods to ensure confidentiality, including a Certificate of Confidentiality from the National Institute of Drug Abuse.
- **Social harm:** Invasions of privacy and breaches of confidentiality may result in embarrassment within one's business or social group. Every effort will be made to maintain confidentiality of the subject's participation to lessen this type of risk.
- **Economic harm:** Eligibility for insurance, political campaigns, and standing in the community are problems may result from loss of confidentiality. Smoking marijuana may hinder application for future employment, if drug screening is a condition of employment. It is likely that detectable traces of marijuana will remain in the subject's hair or blood for a minimum of six weeks after smoking marijuana. If applicable, a letter will be written to the subject's employer explaining their participation in this research study and the dates of participation.
- **Reproductive risks:** The procedures in this research are known to hurt a pregnancy or fetus in the following ways: poor educational attainment. A participant should not become pregnant or father a baby while on this study because the drugs in this study can affect an unborn baby. Women should not breastfeed a baby while on this study. Subjects will be advised they should use birth control while on this study if they engage in opposite sex relations and have not undergone sterilization procedures (vasectomy, tubal ligation). Acceptable methods of birth control are: oral contraceptive pills, diaphragm and condom with spermicide, progestin implant or injection, intrauterine contraceptive device and abstinence.
- **Unknown Risks:** The experimental treatments may have side effects that no one knows about yet. The researchers will let subjects know if they learn anything that might make you change your mind about participating in the study.
- **Breach of Confidentiality:** One potential risk is that of breach of confidentiality wherein a person's DNA information (genetic risk for certain diseases), drug use history, or other sensitive information might be disclosed, resulting in embarrassment or even prejudicial treatment by others.

763

## 764 **Risk Management Procedures and Adequacy of Resources**

### 765 **Risk Management Procedures**

766 In order to minimize the risk of simulator sickness, participants will be slowly trained to adapt to the driving  
767 simulator. The room will also be kept at a cool temperature, and participants will have a small fan blowing on  
768 them. Participants will be evaluated with a Simulator Sickness Questionnaire upon completion of the driving  
769 simulations (assesses symptoms of headache, dizziness, nausea, etc.). Any concerning symptoms will be  
770 addressed by the examiner, and if necessary, a clinician. In the event that any participant does experience  
771 simulator sickness during the course of the study, they will be offered the opportunity to take a break, lie down  
772 on an examining table with the room lights dimmed. If the sickness continues, they will be offered the  
773 opportunity to discontinue the study.

774  
775 Vital signs will be monitored throughout the experiment to monitor the subject's health status as well as to  
776 quantify marijuana's general effects. At any sign of an adverse reaction (e.g. a change in blood pressure or  
777 pulse rate or development of psychological distress), an investigator will be called. Subjects can be transported  
778 to the emergency room. Subjects will remain in the laboratory under direct observation for 6 hours after the  
779 marijuana smoking inhalations are completed. At that time, a final vital sign and self-report status check will be  
780 made and upon satisfactory readings, the subject will be released and driven back to his/her domicile by  
781 taxicab or prearranged transportation. The return transport procedure also will be observed directly by staff to  
782 ensure compliance.

783  
784 To insure safety after the inhalation of the study drug, participants will not be allowed to drive themselves  
785 home. They must appoint a designated driver or if they cannot, we will arrange for taxi service. Participants  
786 will be counseled that they are not to drive or operate heavy machinery the day of the study, should they leave  
787 the study visit early.

788  
789 To reduce fatigue, the time needed to complete the cognitive and behavioral interviews will be minimized by  
790 familiarizing the interviewers with the contents of the questionnaires. Our interviewers are trained not to press  
791 participants to answer questions that seem to be excessively distressing to them, and interviews will be  
792 terminated if the participant is too distressed, too fatigued, or excessively frustrated by the effort.

793  
794 To minimize the risk of hunger and/or dehydration, snacks and juices will be provided throughout the day.

795  
796 A HNRP/CMCR clinician (psychologists, psychiatrists or Masters-level clinician) will be consulted and will make  
797 an assessment in the event that an individual becomes distressed during the course of the interviews, the Beck  
798 Depression Inventory-II score is greater than or equal to 17, or suicidal ideas are endorsed on the Beck  
799 assessments. This assessment involves a semi-structured interview to determine whether the participant is an  
800 immediate danger (i.e. suicidal ideation with intent to harm). If the participant is not in immediate danger, they  
801 will be provided with a list of mental health resources. If the participant does appear to be in immediate danger,  
802 the psychologist will determine the participant's willingness to be assessed in the Emergency Department. If  
803 the participant is willing, the psychologist will escort the participant to the Hillcrest UCSD Medical Center  
804 Emergency Department. If not willing, the psychologist will call Campus emergency, or 911 if the participant  
805 leaves the premises. Community referrals will be made when appropriate.

### 807 **Data and Safety Monitoring Board (DSMB)**

808 A DSMB will be selected utilizing a group of experts that will advise the study investigators, with the primary  
809 responsibility to monitor human subject safety. The members will be comprised of at least 3 independent  
810 clinicians familiar with the conduct of clinical trials. The DSMB will track treatment, laboratory results, clinical  
811 assessments and any adverse events.

812  
813 DSMB meetings may take place via online meeting if not every member is available to meet in person at each  
814 timepoint. The study's statistician will prepare an open report available to all essential members of the study  
815 and the DSMB members and a closed report reviewed only by the DSMB members. The open report will



816 present data in aggregated form (not separated by arm). The closed report will present data by treatment arm,  
817 but in blinded fashion, i.e. the arms will be randomly labeled as arm A and arm B. Treatment labels can be  
818 revealed to the DSMB members upon their request if major safety concerns arise.  
819

820 The reports will include the following data:

- 821 (1) Enrollment and study status: the number of 1) screened subjects; 2) exclusions and reasons; 3)  
822 enrolled subjects and projected enrollment; 4) subjects by visit; 5) subjects completing the entire study;  
823 6) subjects who withdrew (drop-outs) from the study and reasons; and 7) missing visits and reasons.
- 824 (2) Demographic and relevant clinical characteristics of the cohort
- 825 (3) Lab values by visit
- 826 (4) Vital signs and outcomes of medical exam
- 827 (5) Safety data and study related adverse events: 1) the number of adverse events; 2) type and severity  
828 (grade) of the adverse events (mild, moderate, severe), as well as duration and the outcome of adverse  
829 events; 3) number of subjects with adverse events; 4) number of deaths related to adverse events; 5)  
830 unanticipated problems.
- 831 (6) Protocol deviations
- 832
- 833

834 The members of the DSMB will be asked to maintain confidentiality related to the interim data presented in the  
835 closed report until the end of the trial.  
836

### 837 **Privacy and Confidentiality Considerations Including Data Access and Management**

838 The CMCR has stringent protocols in place to protect the privacy of participants and the confidentiality of data.  
839 Specifically, participant-derived data and samples are de-identified, assigned a coded ID, and are maintained  
840 according to a standardized, confidential, and secure manner. Per CMCR standard policy, strict confidentiality  
841 will be maintained. All members of the investigative team are trained regarding the protection of participants'  
842 rights to confidentiality. The investigative teams is required to successfully complete training according to  
843 standards of the Health Insurance Portability and Accountability Act, and to complete the UCSD certification  
844 requirements. The systems within the research center comply with HIPAA regulations for protection of person  
845 identifiable health data. To ensure confidentiality, only the participant's code number appears on all of the data  
846 and forms. Any identifiable information (PII) within the research center is stored encrypted on a physically  
847 segregated internal network with absolutely no links to the de-identified scientific data. The data is stored on a  
848 server located within a keycard restricted server room with extremely limited physical access. In addition to the  
849 physical restrictions, these clients are authenticated against MAC address and a username/password  
850 challenge. The two data systems (identifiable network, de-identified research information system) utilize  
851 separate Access Control Lists (ACL).  
852

853 Each sample is labeled with a unique sample specific ID. The data linking these sample IDs to their  
854 corresponding non-identifiable study ID is stored in a segregated secure database. All stored samples are  
855 accessible only to the CMCR laboratory personnel and the appropriate study members. Samples are stored  
856 under the coded identifiers in freezers equipped with locks. In addition, these freezers are located behind  
857 locked doors that require ID scan entry.  
858

859 To help protect the privacy of subjects, the investigators have obtained a Confidentiality Certificate from the  
860 National Institute on Mental Health (NIMH). With this Certificate, the investigators cannot be forced by court  
861 subpoena to disclose information that may identify a subject in any federal, state, or local civil, criminal,  
862 administrative, legislative, or other proceedings. Disclosure will be necessary, however, upon request of DHHS  
863 or the UCSD Human Research Protections Program for the purpose of audit or evaluation.  
864

### 865 **Potential Benefits**

866 There is no direct benefit to subjects.

867 **Risk/Benefit Ratio**

868 There was a recent safety study of a “standardized herbal cannabis product with 12.5% Δ9-THC” conducted at  
869 seven pain clinics over a one year period<sup>58</sup>. This was a similar concentration to the highest concentration that  
870 we will be using during our 8-hour human laboratory experiment. Controls in the safety study were individuals  
871 with chronic pain from the same clinics who were not cannabis users. The primary outcome consisted of  
872 serious adverse events and non-serious adverse events. Secondary safety outcomes included pulmonary and  
873 neurocognitive function and standard hematology, biochemistry, renal, liver, and endocrine function.  
874 Secondary efficacy parameters included pain and other symptoms, mood, and quality of life. There was no  
875 difference in risk of serious adverse events (adjusted incidence rate ratio = 1.08, 95% confidence interval =  
876 .57–2.04) between groups. Medical cannabis users were at increased risk of non-serious adverse events  
877 (adjusted incidence rate ratio = 1.73, 95% confidence interval = 1.41–2.13); most were mild to moderate. There  
878 were no differences in secondary safety assessments. The authors reasoned that herbal cannabis, when used  
879 by patients with experience of cannabis use as part of a monitored treatment program over 1 year, appears to  
880 have a reasonable safety profile.

881  
882 The present study differs in that participants will be given cannabis acutely. Acute effects may include anxiety  
883 and panic, impaired attention, and memory (while intoxicated), and an increased risk of psychotic symptoms.  
884 Short term cannabis intoxication can hinder the mental processes of organizing and collecting thoughts<sup>59</sup>.  
885 Psychotic episodes are well-documented and typically resolve within minutes or hours although there have  
886 been few reports of symptoms lasting longer<sup>60</sup>. Cannabis has not been reported to cause fatal overdose<sup>61</sup>. The  
887 other major difference is that there are no benefits (e.g., pain relief) to be provided the volunteers in the  
888 present study.

889  
890 The investigators in the present study have performed previous clinical trials involving acute cannabis  
891 exposure<sup>62,63</sup>. Cannabis was well tolerated other than there being psychoactive effects and some memory  
892 impairment acutely. We believe the risk/benefit ratio of the present study to be favorable in the context of the  
893 knowledge to be gained and the public health peril of driving under the influence of cannabis.

894 **Expense to Participant**

895 There will no expense for participants.

896 **Compensation for Participation**

897 Subject payments are requested in order to compensate subjects for their participation. Participants will be  
898 asked to arrange for transportation to and from the research site. If this is not feasible, a taxi ride will be  
899 arranged for them. We will pay subjects for the driving simulation performed during the screening visit a  
900 payment of \$50. We will compensate subjects for time and trouble during the experimental visit at \$22.50 per  
901 hour times 8 hours equals \$180 per subject (potential total of \$230). Full compensation will be given once we  
902 have confirmation that a participant has a reliable form of transportation home (i.e. taxi service or friend).  
903 Compensation will be pro-rated if the subject does not complete the visit at \$22.50 per hour. Subjects who  
904 begin but do not complete the screening visit (e.g. due to ineligibility) will be provided \$10.

905 **FUNDING SUPPORT**

906 This study was authorized and will be funded by the California Legislature pursuant to Assembly Bill 266  
907 (Bonta/Cooley/Jones-Sawyer/Lackey), the Medical Marijuana Regulation and Safety Act<sup>1</sup>.

908 **DRUG PROCESSING**

909 Given that we have received IND approval from the FDA, investigational drugs will be prepared for this study  
910 by the UCSD Investigational Pharmacy. Accountability records will be maintained according to policies and  
911 procedures.

912  
913 Sign out logs will be kept as dictated by DEA officials. At the end of each experimental session and/or study  
914 visit, all unused materials will be collected and stored in a sealed container that will be returned to the UCSD  
915 Investigational Pharmacy, with the exact amount noted and dated in the log (e.g., “bulk cannabis weighing x  
916 mg”). All records will be made available to the DEA and the Research Advisory Panel of California, which  
917 supervises all controlled substance research in California. At the end of the study, all unused plant material

(i.e., cannabis material not smoked or the incinerated product from cigarette combustion) from each subject's driving simulation session will be collected and placed in a container, which will be disposed at the facility used to incinerate unwanted medical materials.

## BIBLIOGRAPHY

1. AB-266 Medical marijuana.(2015-2016)  
[https://leginfo.ca.gov/faces/billNavClient.xhtml?bill\\_id=201520160AB266](https://leginfo.ca.gov/faces/billNavClient.xhtml?bill_id=201520160AB266). Accessed.
2. Grotenhermen F, Leson G, Berghaus G, et al. Developing limits for driving under cannabis. *Addiction (Abingdon, England)*. 2007;102(12):1910-1917.
3. Ramaekers JG, Berghaus G, van Laar M, Drummer OH. Dose related risk of motor vehicle crashes after cannabis use. *Drug Alcohol Depend*. 2004;73(2):109-119.
4. Drummer OH, Gerostamoulos J, Batziris H, et al. The involvement of drugs in drivers of motor vehicles killed in Australian road traffic crashes. *Accid Anal Prev*. 2004;36(2):239-248.
5. Hartman RL, Huestis MA. Cannabis Effects on Driving Skills. *Clin Chem*. 2013;59(3):478-492.
6. Skopp G, Potsch L. Cannabinoid concentrations in spot serum samples 24-48 hours after discontinuation of cannabis smoking. *J Anal Toxicol*. 2008;32(2):160-164.
7. Sewell RA, Poling J, Sofuoglu M. The effect of cannabis compared with alcohol on driving. *Am J Addict*. 2009;18(3):185-193.
8. Kelly E, Darke S, Ross J. A review of drug use and driving: epidemiology, impairment, risk factors and risk perceptions. *Drug Alcohol Rev*. 2004;23(3):319-344.
9. Bates MN, Blakely TA. Role of cannabis in motor vehicle crashes. *Epidemiol Rev*. 1999;21(2):222-232.
10. Walsh JM, de Gier JJ, Christopherson AS, Verstraete AG. Drugs and driving. *Traffic Inj Prev*. 2004;5(3):241-253.
11. Papafotiou K, Carter JD, Stough C. An evaluation of the sensitivity of the Standardised Field Sobriety Tests (SFSTs) to detect impairment due to marijuana intoxication. *Psychopharmacology (Berl)*. 2005;180(1):107-114.
12. Bosker WM, Theunissen EL, Conen S, et al. A placebo-controlled study to assess Standardized Field Sobriety Tests performance during alcohol and cannabis intoxication in heavy cannabis users and accuracy of point of collection testing devices for detecting THC in oral fluid. *Psychopharmacology (Berl)*. 2012;223(4):439-446.
13. Hart CL, van Gorp W, Haney M, Foltin RW, Fischman MW. Effects of acute smoked marijuana on complex cognitive performance. *Neuropsychopharmacology*. 2001;25(5):757-765.
14. Ramaekers JG, Theunissen EL, de Brouwer M, Toennes SW, Moeller MR, Kauert G. Tolerance and cross-tolerance to neurocognitive effects of THC and alcohol in heavy cannabis users. *Psychopharmacology (Berl)*. 2011;214(2):391-401.
15. Huestis MA, Verstraete A, Kwong TC, Morland J, Vincent MJ, de la Torre R. Oral fluid testing: promises and pitfalls. *Clin Chem*. 2011;57(6):805-810.
16. Huestis MA, Henningfield JE, Cone EJ. Blood cannabinoids. II. Models for the prediction of time of marijuana exposure from plasma concentrations of delta 9-tetrahydrocannabinol (THC) and 11-nor-9-carboxy-delta 9-tetrahydrocannabinol (THCCOOH). *Journal of Analytical Toxicology*. 1992;16(5):283-290.
17. Fabritius M, Chtioui H, Battistella G, et al. Comparison of cannabinoid concentrations in oral fluid and whole blood between occasional and regular cannabis smokers prior to and after smoking a cannabis joint. *Analytical and bioanalytical chemistry*. 2013;405(30):9791-9803.
18. Perez-Reyes M. Marijuana smoking: factors that influence the bioavailability of tetrahydrocannabinol. *NIDA Res Monogr*. 1990;99:42-62.
19. Himes SK, Scheidweiler KB, Beck O, Gorelick DA, Desrosiers NA, Huestis MA. Cannabinoids in exhaled breath following controlled administration of smoked cannabis. *Clin Chem*. 2013;59(12):1780-1789.
20. Carter GT, Weydt P, Kyashna-Tocha M, Abrams DI. Medicinal cannabis: rational guidelines for dosing. *IDrugs*. 2004;7(5):464-470.

- 970 21. Brookhuis KA, Volkerts ER, O'Hanlon JF. Repeated dose effects of lormetazepam and flurazepam  
971 upon driving performance. *Eur J Clin Pharmacol.* 1990;39(1):83-87.
- 972 22. Ramaekers JG, O'Hanlon JF. Acrivastine, terfenadine and diphenhydramine effects on driving  
973 performance as a function of dose and time after dosing. *Eur J Clin Pharmacol.* 1994;47(3):261-266.
- 974 23. Theunissen EL, Vermeeren A, van Oers AC, van Maris I, Ramaekers JG. A dose-ranging study of the  
975 effects of mequitazine on actual driving, memory and psychomotor performance as compared to  
976 dexchlorpheniramine, cetirizine and placebo. *Clin Exp Allergy.* 2004;34(2):250-258.
- 977 24. Weiler JM, Bloomfield JR, Woodworth GG, et al. Effects of fexofenadine, diphenhydramine, and alcohol  
978 on driving performance: A randomized placebo-controlled trial in the Iowa Driving Simulator. *Annals of  
979 Internal Medicine.* 2000;132:354-363.
- 980 25. Lenne MG, Dietze P, Rumbold GR, Redman JR, Triggs TJ. The effects of the opioid  
981 pharmacotherapies methadone, LAAM and buprenorphine, alone and in combination with alcohol, on  
982 simulated driving. *Drug Alcohol Depend.* 2003;72(3):271-278.
- 983 26. Arnedt JT, Wilde GJ, Munt PW, MacLean AW. How do prolonged wakefulness and alcohol compare in  
984 the decrements they produce on a simulated driving task? *Accid Anal Prev.* 2001;33(3):337-344.
- 985 27. Ramaekers JG, Robbe HW, O'Hanlon JF. Marijuana, alcohol and actual driving performance. *Hum  
986 Psychopharmacol.* 2000;15(7):551-558.
- 987 28. Brookhuis KA, de Waard D, Samyn N. Effects of MDMA (ecstasy), and multiple drugs use on  
988 (simulated) driving performance and traffic safety. *Psychopharmacology.* 2004;173(3-4):440-445.
- 989 29. Marcotte TD, Heaton RK, Wolfson T, et al. The impact of HIV-related neuropsychological dysfunction  
990 on driving behavior. *Journal of the International Neuropsychological Society.* 1999;5(7):579-592.
- 991 30. Marcotte TD, Rosenthal TJ, Roberts E, et al. The contribution of cognition and spasticity to driving  
992 performance in multiple sclerosis. *Archives of physical medicine and rehabilitation.* 2008;89(9):1753-  
993 1758.
- 994 31. O'Hanlon JF. Driving performance under the influence of drugs: rationale for, and application of, a new  
995 test. *British journal of clinical pharmacology.* 1984;18 Suppl 1:121S-129S.
- 996 32. O'Hanlon JF, Volkerts ER. Hypnotics and actual driving performance. *Acta Psychiatr Scand Suppl.*  
997 1986;332:95-104.
- 998 33. Vermeeren A, O'Hanlon JF. Fexofenadine's effects, alone and with alcohol, on actual driving and  
999 psychomotor performance. *The Journal of allergy and clinical immunology.* 1998;101(3):306-311.
- 1000 34. Marcotte TD, Scott JC. The assessment of driving abilities. *Advances in Transportation Studies: An  
1001 International Journal.* 2004:79-90.
- 1002 35. Ostlund J, Nilsson L, Tomros J, Forsman A. *Calibration tasks for methods which assess demand due to  
1003 the use of invehicle systems.* Linköping, Sweden: VTI;2006.
- 1004 36. Engelmann C. California Manual on Uniform Traffic Control Devices (MUTCD). Sacramento, CA: State  
1005 of California. <http://www.dot.ca.gov/hq/traffops/engineering/mutcd/>. In: (Caltrans) CDoT, ed2014.
- 1006 37. Simons-Morton BG, Bingham CR, Falk EB, et al. Experimental effects of injunctive norms on simulated  
1007 risky driving among teenage males. *Health Psychol.* 2014;33(7):616-627.
- 1008 38. Caird J, Chisholm S, Edwards C, Creaser J. The effect of yellow light onset time on older and younger  
1009 drivers' perception response time (PRT) and intersection behavior. *Transportation Research.*  
1010 2007;10(Part F):383-396.
- 1011 39. Ramaekers JG, Kauert G, Theunissen EL, Toennes SW, Moeller MR. Neurocognitive performance  
1012 during acute THC intoxication in heavy and occasional cannabis users. *J Psychopharmacol.*  
1013 2009;23(3):266-277.
- 1014 40. Bosker WM, Karschner EL, Lee D, et al. Psychomotor function in chronic daily Cannabis smokers  
1015 during sustained abstinence. *PLoS One.* 2013;8(1):e53127.
- 1016 41. Ramaekers JG, Moeller MR, van Ruitenbeek P, Theunissen EL, Schneider E, Kauert G. Cognition and  
1017 motor control as a function of Delta9-THC concentration in serum and oral fluid: limits of impairment.  
1018 *Drug Alcohol Depend.* 2006;85(2):114-122.
- 1019 42. Sewell RA, Schnakenberg A, Elander J, et al. Acute effects of THC on time perception in frequent and  
1020 infrequent cannabis users. *Psychopharmacology (Berl).* 2013;226(2):401-413.
- 1021 43. Miller LL, McFarland D, Cornett TL, Brightwell D. Marijuana and memory impairment: effect on free  
1022 recall and recognition memory. *Pharmacol Biochem Behav.* 1977;7(2):99-103.

- 1023 44. Ranganathan M, D'Souza DC. The acute effects of cannabinoids on memory in humans: a review.  
1024 *Psychopharmacology (Berl)*. 2006;188(4):425-444.
- 1025 45. Lane SD, Cherek DR, Lieving LM, Tcheremissine OV. Marijuana effects on human forgetting functions.  
1026 *J Exp Anal Behav*. 2005;83(1):67-83.
- 1027 46. Wolff K, Johnston A. Cannabis use: a perspective in relation to the proposed UK drug-driving  
1028 legislation. *Drug Test Anal*. 2014;6(1-2):143-154.
- 1029 47. Chindarkar NS, Park HD, Stone JA, Fitzgerald RL. Comparison of Different Time of Flight-Mass  
1030 Spectrometry Modes for Small Molecule Quantitative Analysis. *J Anal Toxicol*. 2015;39(9):675-685.
- 1031 48. Schwoppe DM, Karschner EL, Gorelick DA, Huestis MA. Identification of recent cannabis use: whole-  
1032 blood and plasma free and glucuronidated cannabinoid pharmacokinetics following controlled smoked  
1033 cannabis administration. *Clin Chem*. 2011;57(10):1406-1414.
- 1034 49. JK H, JC T, PG M. Cannabinoid content of individual plant organs from different geographical strains of  
1035 *Cannabis sativa* L. *Journal of natural products*. 1980;43:112-122.
- 1036 50. ElSohly M. Chem constituents of cannabis. In: Grotenhermen F, Russo E, eds. *Cannabis and*  
1037 *cannabinoids: pharmacology, toxicology, and therapeutic potential*. New York: Haworth Integrative  
1038 Healing Press; 2002:27-36.
- 1039 51. Pomahacova B, Van der Kooy F, Verpoorte R. Cannabis smoke condensate III: the cannabinoid  
1040 content of vaporised *Cannabis sativa*. *Inhal Toxicol*. 2009;21(13):1108-1112.
- 1041 52. Elsohly HN, Elsohly MA. Marijuana smoke condensate: chemistry and pharmacology. In: ElSohly M,  
1042 ed. *Marijuana and the cannabinoids*. Totowa (NJ): Humana Press; 2007:67-96.
- 1043 53. Moore C, Vincent M, Rana S, Coulter C, Agrawal A, Soares J. Stability of Delta(9)-tetrahydrocannabinol  
1044 (THC) in oral fluid using the Quantisal collection device. *Forensic Sci Int*. 2006;164(2-3):126-130.
- 1045 54. Toennes SW, Kauert GF, Steinmeyer S, Moeller MR. Driving under the influence of drugs -- evaluation  
1046 of analytical data of drugs in oral fluid, serum and urine, and correlation with impairment symptoms.  
1047 *Forensic Sci Int*. 2005;152(2-3):149-155.
- 1048 55. Samyn N, De Boeck G, Wood M, et al. Plasma, oral fluid and sweat wipe ecstasy concentrations in  
1049 controlled and real life conditions. *Forensic Sci Int*. 2002;128(1-2):90-97.
- 1050 56. Beck O, Stephanson N, Sandqvist S, Franck J. Detection of drugs of abuse in exhaled breath using a  
1051 device for rapid collection: comparison with plasma, urine and self-reporting in 47 drug users. *Journal of*  
1052 *breath research*. 2013;7(2):026006.
- 1053 57. Robins LN, Helzer JE, Croughan J, Ratcliff KS. National Institute of Mental Health Diagnostic Interview  
1054 Schedule. Its history, characteristics, and validity. *Arch Gen Psychiatry*. 1981;38(4):381-389.
- 1055 58. Ware MA, Wang T, Shapiro S, Collet JP. Cannabis for the Management of Pain: Assessment of Safety  
1056 Study (COMPASS). *J Pain*. 2015;16(12):1233-1242.
- 1057 59. Hall W, Solowij N. Adverse effects of cannabis. *Lancet*. 1998;352(9140):1611-1616.
- 1058 60. D'Souza DC, Sewell RA, Ranganathan M. Cannabis and psychosis/schizophrenia: human studies. *Eur*  
1059 *Arch Psychiatry Clin Neurosci*. 2009;259(7):413-431.
- 1060 61. Calabria B, Degenhardt L, Hall W, Lynskey M. Does cannabis use increase the risk of death?  
1061 Systematic review of epidemiological evidence on adverse effects of cannabis use. *Drug Alcohol Rev*.  
1062 2010;29(3):318-330.
- 1063 62. Wilsey B, Marcotte T, Tsodikov A, et al. A randomized, placebo-controlled, crossover trial of cannabis  
1064 cigarettes in neuropathic pain. *J Pain*. 2008;9(6):506-521.
- 1065 63. Wilsey B, Marcotte T, Deutsch R, Gouaux B, Sakai S, Donaghe H. Low-dose vaporized cannabis  
1066 significantly improves neuropathic pain. *J Pain*. 2013;14(2):136-148.
- 1067
