# Supplementary material for: Evaluation of Field Sobriety Tests for Identifying Drivers Under the Influence of Cannabis: A Randomized Clinical Trial
Source: PubMed Central journal article supplement (PMC10398547; doi:10.1001/jamapsychiatry.2023.2345), 2023-08-02
Supplement: jamapsychiatry-e232345-s003.pdf [file jamapsychiatry-e232345-s003.pdf]

## Data Sharing Statement

Marcotte. Evaluation of Field Sobriety Tests for Identifying Drivers Under the Influence of Cannabis. *JAMA Psychiatry*. Published August 02, 2023.

doi:10.1001/jamapsychiatry.2023.2345

### Data

**Data available:** Yes

**Data types:** Deidentified participant data, Data dictionary

**How to access data:** [cmcr@ucsd.edu](mailto:cmcr@ucsd.edu)

**When available:** With publication

### Supporting Documents

**Document types:** None

### Additional Information

**Who can access the data:** Approved researchers

**Types of analyses:** Meta-analysis

**Mechanisms of data availability:** With signed data use agreement
